# Supplementary material
Source: PubMed Central journal article supplement (PMC7116042)
Supplement: EMS94010-supplement-EMS94010_SuppNote.pdf [file EMS94010-supplement-EMS94010_SuppNote.pdf]

## 1 **Supplementary Note**

2

### 3 **Clonal dynamics of the back skin IFE**

4

5 To address the changes in cell fate that accompany stretch-mediated expansion of mouse  
6 back skin interfollicular epidermis (IFE), it is necessary to first establish a model of the  
7 unperturbed system based on the quantitative analysis of the clonal data. To record the  
8 total output of individual labelled cells, clones were scored based on the number of basal  
9 and suprabasal cells. Since the K14 promoter can in principle target all basal cells, whether  
10 proliferative or terminally differentiated, we focused on the ensemble of clones that retain  
11 at least one basal cell (Fig. 2a-c and Extended Data Fig. 4a, b). By focusing on the population  
12 of “persisting” clones, we circumvent the challenge of trying to identify single-cell clones  
13 that had already terminally differentiated at the time of induction, as well as mitigating  
14 potential uncertainties surrounding the relative efficiency of the K14 promoter in labelling  
15 proliferative and differentiated basal cell populations. Although this approach also neglects  
16 the transient population of expanded clones that have fully-differentiated, stratified, but  
17 not yet become fully shed, the joint distribution of basal and total size of persisting clones  
18 provides an rich data set that can be used to constrain any viable model.

19

20 To confirm that the K14 promoter targets cells that include the self-renewing basal cell  
21 population, we first determined the time-evolution of the average labelled cell fraction,  
22 obtained as the product of the average basal clone size and the areal density of persisting  
23 clones (Fig. 2d-f). In homeostasis, the average labelled cell fraction must converge over time  
24 to a constant value, with any transient variation being a measure of the degree to which the  
25 K14 promoter targets preferentially the self-renewing population<sup>1</sup>. Despite potential mouse-  
26 to-mouse variation in the induction efficiency, the average labelled cell fraction of the  
27 control system remained approximately constant over the two-week time course (Fig. 2e),  
28 indicating that clonally labelled cells include the renewing basal cell population.

29

30 Next, we considered whether features of the clonal data could provide insight into the fate  
31 behaviour of individual cells. Previously, it has been shown that, for stem cell renewal  
32 strategies of epithelial maintenance based on population asymmetry, where stochastic stem  
33 cell loss through differentiation is compensated by the duplication of neighbours, the  
34 distribution of clone sizes converges over time to a statistical scaling behaviour  
35 characterised by an exponential size dependence<sup>2</sup>. Consistently, and in common with the  
36 behaviour reported in other mouse epithelial tissues, analysis of the basal and total clone  
37 size distribution of the back skin IFE at the longest time point, day (D)14, revealed an  
38 approximate exponential dependence (Fig. 2h), consistent with population asymmetric self-  
39 renewal.

40

41 Early clonal tracing studies of mouse tail epidermis placed emphasis on a model in which IFE  
42 is maintained by a single equipotent population of basal progenitors where the frequencies  
43 of stochastic cell duplication and terminal division are balanced so that, on average, their  
44 number is maintained constant over time – a dynamics known as a “critical birth-death”  
45 process<sup>3</sup>. (For an up-to-date review of this original “one-progenitor cell model” and its  
46 application to a range of clonal fate studies, see Ref. <sup>4</sup>.) However, based on the statistical  
47 scaling behaviour of clone sizes alone, more “refined” models of cell fate cannot be ruled

48 out<sup>2</sup>. In particular, a hierarchical organization in which commitment to differentiation occurs  
49 not directly, but through a limited series of terminal divisions would, in the long-term, give  
50 rise to the same exponential dependence of the clone size distribution. Moreover, in the  
51 planar two-dimensional geometry of the IFE, exponential scaling behaviour of the size  
52 distribution cannot discriminate between models in which fate asymmetry is regulated  
53 through a cell-autonomous programme, or one in which cell duplication and differentiation  
54 are locally correlated in space, i.e. stochastic cell division follows in response to the  
55 differentiation and delamination of a neighbour, or *vice versa*<sup>2</sup>. It is, however, clear that, in  
56 the 2D setting of the skin epidermis, a *purely* cell-intrinsic programme would not be tenable  
57 over the long-term<sup>5</sup>.

58  
59 However, by studying detailed features of the clone size distribution at shorter chase times  
60 (prior to the onset of scaling), further insight into potential heterogeneities and fate of basal  
61 progenitors can be sought<sup>6</sup>. Notably, in the current study, inspection of the basal clone size  
62 distribution revealed evidence of a small but statistically significant bias towards clones  
63 containing an even number of basal cells: Across the two-week time course, some 65±5% of  
64 persisting clones have an even number of cells (Fig. 2b and Extended Data Fig. 4c), a  
65 correlation that remained visible in the total clone size distribution. In principle, such a  
66 feature might have been (and in earlier studies was) attributed to statistical fluctuations due  
67 to small clone number statistics, or transient effects created by synchronicity in the timing  
68 of cell division and/or stratification. However, significantly, this even-odd correlation of  
69 clone size remained pronounced even at longer chase times and for larger clone sizes, and  
70 became dramatically enhanced under perturbed conditions (see below), suggesting that its  
71 origin may provide a signature of the underlying cell fate behaviour.

### 72 73 *One-progenitor model*

74  
75 Based on previous studies, we first considered whether the even/odd signature could be  
76 explained within the framework of a one-progenitor model, hypothesizing that its origin  
77 could lie in a predominance of cell divisions leading to symmetrical fate outcomes. To test  
78 this idea, we first considered a minimal two-dimensional (square) lattice model in which  
79 each site plays host to precisely one basal and one suprabasal cell, consistent with the  
80 relative cell fractions observed in steady-state. Then, with probability  $1 - r$ , cell division  
81 leads to asymmetric fate outcome, with one cell remaining in the basal layer and the other  
82 transferring to the suprabasal cell layer. Conversely, with probability  $r$ , cell division results  
83 in correlated symmetric fate outcome, where one daughter cell remains on the original site  
84 and the other “displaces” the cell at a neighbouring site, leading to its differentiation and  
85 stratification (Fig. 2l, left). Conceptually, we may think of such a replacement event as a  
86 reflection of a prior symmetric terminal division of the neighbouring renewing cell during its  
87 previous round of division. In the particular case that  $r = 1$ , such behaviour translates to  
88 the “Voter model” dynamics proposed famously by Marques-Pereira and LeBlond in studies  
89 of rat oesophagus<sup>7</sup> and, developed more recently, by Mesa et al. in the context of the  
90 mouse ear epidermis<sup>8</sup>. In this case, the dynamics involves only symmetric fate outcomes –  
91 correlated symmetric duplication and terminal division. In the general case, where  $r < 1$ ,  
92 the model allows for a degree of fate asymmetry.

93

94 To fit the model to the data, we made use of a least-squares fit of the marginal distribution  
95 of basal and total clone size to the results of stochastic simulation (based on the analysis of  
96 an ensemble of  $10^6$  units organized in a square lattice), taking as an initial condition  
97 individually labelled cells in the renewing basal compartment at “day -3”. Scanning the two-  
98 dimensional space of parameter values, we computed the mean-square difference between  
99 the result of the model simulation and the distribution of basal and total clone sizes,  
100 integrated across all time points. Based on this analysis, we obtained the best fit (least-  
101 square value) for  $r = 0.72$  and a cell division time of  $1/\lambda = 4.8$  days (Extended Data Fig. 3i-  
102 m). The map of least-square values (Extended Data Fig. 3l) shows the sensitivity of the  
103 model fit to the data. Notably, despite a tilt towards symmetric fate decisions (viz.  $r > 0.5$ ),  
104 the fits did not reproduce “even-odd” correlations in clone size (Extended Data Fig. 3m).  
105 Based on such a one-progenitor model, the irregular timing of cell division, combined with  
106 the stochastic stratification of differentiating cells out of the basal layer and their  
107 subsequent loss from the tissue, leads to a rapid erasure of even-odd correlations.

108

109 Similarly, we considered whether local spatial fluctuations in cell density could lead to  
110 correlated cell division or delamination, i.e. if the local cell density were high, the two  
111 daughter progenies of a basal cell division might be more likely to differentiate and  
112 delaminate while, if the local density were low, the progeny might be more likely to remain  
113 in the proliferative compartment<sup>9</sup>. However, we reasoned that, although such local density  
114 fluctuations might lead to transient pair correlations in the clonal data, if any pair of  
115 neighbouring cells could participate equally in progenitor cell loss and replacement, such  
116 effects would, once again, become rapidly erased from the clonal record. The persistence of  
117 even-odd correlations to longer time points (Fig. 2b and Extended Data Fig. 3c) and, indeed,  
118 its re-emergence as an even more prominent feature in perturbed conditions (discussed  
119 below), suggested that its origin must instead be rooted in a persistent niche-like  
120 organization.

121

### 122 *Two-progenitor model*

123

124 To this end, we next considered an organization that echoes the canonical epidermal  
125 proliferative unit (EPU) paradigm<sup>10, 11</sup>. Specifically, we hypothesized that the back skin IFE is  
126 comprised of a mosaic of units, each of which plays host to precisely two basal cells and  
127 their differentiated suprabasal cell progenies. Then, in the course of tissue turnover, the  
128 differentiation and stratification of a basal cell is compensated by the division of its partner  
129 within the same unit. Indeed, such a model of basal cell loss compensated by local cell  
130 division would mirror the Voter model considered above. However, to account for the  
131 prevalence and persistence of even cell numbers in clones, we reasoned that cell  
132 differentiation must involve a terminal division so that not one, but two differentiated cells  
133 enter the suprabasal cell layers. Within such a framework, following the random genetic  
134 labelling of basal cells, individual clones would either become quickly lost through terminal  
135 division and stratification, or the unit would become “monoclonally fixed” with both basal  
136 cells in the unit labelled and, depending on the nature of cell loss (viz. shedding), suprabasal  
137 cells numbers also enriched for even values.

138

139 Although such a model would capture (trivially) the even-odd character of the data,  
140 persisting clones do not become “fixed” with just two basal cells, but continue to expand in

141 size over time while others are lost through differentiation, calling for a further refinement  
142 of the “proliferative unit” model. Therefore, we further proposed that such a pattern of  
143 correlated cell loss and replacement can occur (see Fig. 2l, right for details), albeit at a  
144 potentially reduced frequency, between neighbouring units as well as within units. In this  
145 case, the unit structure would ensure enrichment of even clone sizes while, over the long-  
146 term, the envelope of the clone size distribution would converge onto the hallmark  
147 exponential scaling form implied by such a pattern of correlated stochastic progenitor cell  
148 loss and replacement between neighbouring units.

149  
150 Lastly, to complete the definition of the model, it was necessary to define whether both  
151 basal cells within an individual unit have the same renewal potential, or whether they are  
152 arranged in a hierarchy with one cell harbouring long-term renewal potential and the other  
153 irreversibly committed to differentiation via terminal division. Notably, analysis of all clones  
154 (persisting and “basal-detached”) at the D2 time point – which translates to some 5 days  
155 post-induction – showed that the vast majority of 2-cell clones (80 out of 101) were  
156 restricted to the basal layer (Extended Data Table 1), suggesting that the K14 promoter  
157 targets cells primed for renewal. Moreover, of the remaining 21 two-cell clones, just 4  
158 comprised one basal and one suprabasal cell, while the majority comprised two suprabasal  
159 cells, consistent with terminal division and correlated stratification of sister cells. Finally,  
160 among the small minority of clones containing a total of 4 cells, 5 were all basal, 2  
161 comprised a basal pair and a suprabasal pair, and 1 was fully-suprabasal. No 4-cell clone  
162 contained an odd number of suprabasal cells. Taken together, these results were suggestive  
163 of an engrained hierarchy within the units, with one basal cell belonging to the renewing  
164 compartment and the other committed to differentiation through terminal division.

165  
166 Before considering what might be the basis of such a two-progenitor compartment model,  
167 its specificity, and its relation to previous models of IFE maintenance, we first considered  
168 the extent to which it could capture the clonal dynamics of the homeostatic control system.  
169 To this end, we considered a two-dimensional square lattice of units, each of which hosts  
170 one renewing basal progenitor (which we termed a “stem cell”), and one basal progenitor  
171 committed to differentiation through one round of terminal division and stratification (Fig  
172 2l, right). (Note that variations in the coordination number of the lattice – square vs.  
173 hexagonal, etc. – would lead to only minor changes in the predicted clone size distributions  
174 whose effects would in any case be beyond the resolution of the experimental data.) Then,  
175 at rate  $\lambda$ , basal cells divide so that, with probability  $1 - r$ , the renewing basal cell undergoes  
176 an “asymmetric division” replacing its partner in the same unit which, in turn, undergoes  
177 terminal division and stratification into the suprabasal layer. Here, for simplicity, we  
178 suppose that terminal division and stratification occur contemporaneously so that the two  
179 differentiated daughter cells are transferred immediately to the suprabasal cell layer. A  
180 generalization of the model that allowed for a small time delay between terminal division  
181 and stratification would not significantly alter the predicted clonal dynamics, providing that  
182 stratification of sister cells occurs in a near-synchronous manner – a correlation consistent  
183 with the D2 clonal data (Extended Data Table 1) and, in fact, reported in the live-imaging  
184 study of ear epidermis<sup>12</sup>. Conversely, with probability  $r$ , the renewing basal cell divides  
185 symmetrically, replacing a “renewing” basal cell in a neighbouring unit, which in turn  
186 undergoes terminal division and stratification.

187

188 Finally, to accommodate the loss of suprabasal cells through shedding, we proposed that  
189 the production of new differentiated cells within a given unit leads to the displacement and  
190 irreversible loss of existing suprabasal cells in that unit. To accommodate the effects of  
191 stochasticity in the loss rate, we considered a suprabasal capacity that is twice the  
192 measured value, but randomly reject one half of the cell pairs in scoring the total suprabasal  
193 unit occupancy of cells. (Note that, since stem cell loss-replacement events involve the  
194 correlated cell division of two renewing stem cells, the average cell cycle time,  $\tau$ , of  
195 renewing cells is related to  $\lambda$  through the relation  $\tau = (1 - r)/\lambda + 2r/\lambda = (1 + r)/\lambda$ .  
196 Moreover, since the composition of each unit is balanced, the division rates of the renewing  
197 and committed cells must be equal.) In summary, in steady-state, the model depends on  
198 just two adjustable parameters,  $\lambda$  and  $r$ , which must be fit against the range of basal and  
199 total clone size data, integrated across multiple time points (Extended Data Fig. 4a).

200  
201 Scanning the two-dimensional space of parameter values (Extended Data Fig. 3n), using a  
202 least-square fit, we obtained the best fit with  $1/\lambda = 4.5$  days and a relative rate of  
203 symmetric division of  $r = 0.21$ , i.e. some 4 out of 5 renewing basal cell divisions result in  
204 asymmetric fate outcome within a unit, while 1 in 5 result in the loss and replacement of a  
205 neighbour – values that resonate with reported fits to the one-progenitor model in other  
206 epithelial contexts<sup>3,4,13</sup>. With this parameter combination, the marginal clone size  
207 distributions reproduced the hallmark even-odd signature and an excellent fit to the  
208 measured clone size distributions (Extended Data Fig. 4a). The same parameter choice  
209 faithfully predicted the average clone size dependences and clonal persistence (Fig. 2c, d)

210  
211 Based on this analysis, we found that a minimal (two-parameter) two-progenitor model is  
212 capable of predicting the range of clonal data. However, generalizations and refinements of  
213 the model in which, for example, progenitors are capable of more than one round of  
214 terminal division, a time-delay is introduced between terminal division and stratification,  
215 progenitors and stem cells are capable of a low rate of interconversion, etc., cannot be ruled  
216 out. In this sense, the current model should be considered a caricature of what may be a  
217 richer, more complex, cellular organization and dynamics. However, we can conclude that a  
218 model based on an equipotent one-progenitor cell model is not consistent with the fine  
219 even-odd signature of the short- and long-term clonal data in the back skin IFE. While the  
220 application of the model to other epithelial tissues lies beyond the scope of the current  
221 study, it is interesting to note that a similar persistent even-odd signature in clone fate data  
222 is clearly visible in the mouse oesophagus, even after 6 months tracing post-induction (see  
223 Fig. S4c of Ref.<sup>4</sup>) suggesting that such a hierarchical organisation may in fact be a conserved  
224 feature of squamous epithelial tissues.

225  
226 At its core, the proposed model shares much in common with the model of Marques-Pereira  
227 and LeBlond<sup>7</sup>. In this paradigm, the basal layer constitutes an open or “facultative” niche in  
228 which chance differentiation and stratification of basal keratinocytes is compensated by the  
229 symmetric division of a neighbour. This scenario has received renewed interest through  
230 intravital live-imaging studies of the mouse ear epidermis by Mesa et al.<sup>8</sup>, backed up by  
231 functional analyses of biomechanical signalling by Miroshnikova et al.<sup>14</sup>. From the  
232 quantitative analysis of short-term cell dynamics and the spatial reorganization of basal cells  
233 following cell delamination, a model was proposed in which stratification drives symmetrical  
234 division of neighbours. In this model, cell fate is not assigned during division, but through

235 sporadic differentiation linked to cell stratification. In the current model, cell delamination is  
236 also correlated with cell division, but differentiation occurs through one round of terminal  
237 division. Importantly, by decoupling commitment to differentiation from cell delamination,  
238 these findings suggest that stem cell fate is assigned during cell division within the basal  
239 layer raising the question of how fate balance is regulated mechanistically.

240  
241 Is there a precedent for the current two-progenitor compartment model? Indeed, the  
242 proposed cellular organization is reminiscent of that inferred from the clonal analysis of the  
243 *Drosophila* midgut<sup>15</sup>. Here, stem cells lie anchored tightly to the basement membrane,  
244 giving rise to enteroblasts that mature into enteroendocrine cells or, through endo-  
245 replication, into enterocytes. In the course of turnover, stem cells predominantly undergo  
246 asymmetric divisions, replenishing cells within their “unit” (or “nest”) while, with lower  
247 probability, symmetric division leads to the stochastic loss and replacement of stem cells at  
248 neighbouring sites. In this case, intestinal stem cells compete neutrally for territory on the  
249 basement membrane while giving rise predominantly through asymmetric division to  
250 progenies that are committed to a differentiation pathway that, in this case, is not  
251 accompanied by cell division.

### 252 253 **Clonal dynamics during TPA treatment**

254  
255 Before considering whether the two-progenitor cell model can capture the clonal dynamics  
256 during stretch-mediated expansion of tissue, we first turned to consider the role of TPA  
257 treatment. Although TPA administration may elicit an additional stress response, from the  
258 perspective of the clonal dynamics, prolonged treatment is expected to establish a new  
259 steady-state that, from the BrdU incorporation data (Extended Data Fig. 4d-f), involves an  
260 overall increase in the basal cell division rate by a factor of around 2. Consistent with this  
261 increase, analysis of the clonal data shows a corresponding increase in the average clone  
262 size, while the predominance of clones bearing an even cell number becomes extremely  
263 pronounced (Extended Data Fig. 4g). Focusing on D1 and D14 time points, we therefore  
264 questioned whether the basal and total clone size distribution could be predicted using the  
265 same model as the control, but with an elevated division rate. From a least-squares analysis,  
266 we found the two-progenitor cell model could provide an excellent fit to the clonal data  
267 with an average cell division time of  $1/\lambda = 2.8$  days, an increase quantitatively consistent  
268 with the BrdU data, and  $r = 0.14$ , decreased from that found under unperturbed conditions  
269 (Extended Data Fig. 4e). Notably, with this reduction in the frequency of loss/replacement  
270 events, the model faithfully reproduced the pronounced even-odd signature in basal and  
271 total clone sizes. In this case, since the one-progenitor model cannot recapitulate an even-  
272 odd signature, its quantitative comparison was not considered.

### 273 274 **Clonal dynamics during stretch-mediated expansion**

275  
276 With these preliminaries, it was now possible to address the clonal dynamics following  
277 stretch-mediated expansion. Specifically, following the same induction protocol as used for  
278 control animals, at day 0 the tissue was subject to an abrupt isotropic expansion that was  
279 accommodated initially through a corresponding increase of the basal cell surface area  
280 leading to a proportionate decrease in cell density. This perturbation in cell density then  
281 became progressively resolved through excess cell proliferation in the basal layer (Fig. 1b-e).

282 This adjustment in cell kinetics and fate was reflected in a strong perturbation of the clone  
283 size dependences, recorded over the two weeks chase (Fig. 2g-j).

284  
285 In common with the control data, the distribution of basal clone sizes also showed  
286 convergence towards an exponential dependence (Fig. 2k) characterised by a single size  
287 scale, suggesting that the expansion of tissue is likely to be mediated by a single equipotent  
288 population. However, in this case, the expansion in average basal clone size was not  
289 compensated by a drop in clone persistence, consistent with the net number of marked  
290 basal cells increasing overall, as expected during the expansion of tissue (Fig. 2i). Moreover,  
291 the estimate of clone persistence showed no statistically significant change between 2 and 4  
292 days post-expansion, consistent with clones being approximately conserved in number over  
293 the early phase of recovery.

294  
295 Although the distribution of clone sizes preserves the exponential dependence, this does  
296 not mean that the underlying fate behaviour and proliferation kinetics must be invariant  
297 during and after the period of expansion. Indeed, measurements based on BrdU  
298 incorporation suggest a dramatic adjustment in the cell cycle rate, changing by more than a  
299 factor of 2 following expansion, before subsiding towards the normal steady-state value by  
300 around D14 (Fig. 1e). At the same time, there was a significant, and relatively abrupt,  
301 thickening of the IFE following expansion, translating to an increase in the number of  
302 suprabasal cell layers from around one to four (Fig. 1f,g).

303  
304 To model the dynamics during stretch-mediated expansion, we looked for a minimal  
305 adjustment of the steady-state model, taking as an input the measured variation in the  
306 basal cell proliferation rate, as inferred from BrdU incorporation, normalised by the control  
307 estimate of the average cell proliferation rate. Following expansion, the area of IFE is  
308 increased by a factor of around 2 (Fig. 1a-c). To accommodate this increase, we  
309 implemented the following “computational trick”: First, to seed the lattice simulations with  
310 the initial clone size distribution at the time of expansion, we allowed the system to develop  
311 in the manner of the control group over the first 3 days post-induction. Then, on expansion  
312 (defined as day 0), we “emptied” at random precisely one half of cell lattice sites (basal and  
313 suprabasal), mimicking the associated reduction in cell density by a factor of two following  
314 stretch-mediated expansion. Then, we allowed renewing basal cells to repopulate the lattice  
315 sites through symmetrical division, leading to the repopulation of unoccupied sites. Such a  
316 programme can be captured by the same intra- and inter-unit cell division processes as in  
317 the steady-state control condition, but without the requirement that basal cell duplication  
318 be compensated by terminal division and stratification of neighbours; rather, compensation  
319 would only occur if target sites were already occupied, as in steady-state. Such dynamics  
320 would then lead to a progressive regeneration of tissue back towards steady-state, even if  
321 the net basal cell division rate,  $\lambda$ , and the relative rates of symmetric and asymmetric  
322 division,  $r$ , were left unchanged from their steady-state values. However, based on BrdU  
323 incorporation measurements, we know that the division rate changes significantly over the  
324 early time course, and we can anticipate that the fate parameter,  $r$ , is also changed in  
325 response to the perturbation, reflecting the need to expand the basal progenitor pool. In  
326 principle, this engages a “continuum” of fit parameters, indexed by the temporal variation  
327 of  $r$ , alongside potential further fine-tuning of the division rates. However, in practice, the  
328 division rates are heavily constrained by the BrdU assay, leaving only the associated  $r$  values

329 between the respective four chase time points as effective fitting parameters, limiting  
330 significantly the available phase space for model fitting.

331

332 Applying this minimal model, we obtained a remarkably close fit to the data, faithfully  
333 reproducing much of the fine detail in respect of the even-odd clone size variation, and its  
334 enrichment at the longest chase times (Fig. 2g, Extended Data Fig. 3h and Extended Data  
335 Fig. 4b-d). Based on a coverage of the parameter space of  $r$  values, a least-squares fit of the  
336 model to the marginal basal and total clone size distributions showed that the abrupt  
337 increase observed in the division rate (Extended Data Fig. 4b) is accompanied by a parallel  
338 pulse increase in  $r$  following expansion (Extended Data Fig. 4c), which subsides dramatically,  
339 falling almost to zero at the two longest chase times.

340

341 Finally, the observed increase in average clone size does not straightforwardly translate to a  
342 corresponding overall increase in suprabasal cell number over the time course. On this  
343 basis, it seems likely that the increase in suprabasal cell number is achieved through the  
344 retention of some differentiated cells following expansion rather than an overt increase in  
345 the production rate of newly-differentiated cells as a proportion of the progenitors, a  
346 conclusion supported by detailed measurements of all clones (including fully basal-  
347 detached) at EXPD2 (Extended Data Table 2).

348

#### 349 **Expansion during treatment conditions**

350

351 Lastly, to complete our analysis of the clonal data, we considered the behaviour under two  
352 treatment conditions: the inhibition of MEK/ERK/AP1 pathway by Trametinib and the MAL  
353 inhibitor. For details of the predicted effects of the inhibitors, we refer to the main text.  
354 Despite the scale of the perturbation imposed by the hydrogel, in treated conditions,  
355 analysis of BrdU incorporation showed that the abrupt area increase resulted in only a  
356 modest and sustained increase in the cell proliferation rate (Fig. 4f and Extended Data Fig.  
357 10d). Therefore, to analyse the data, we considered the two-progenitor compartment  
358 model in which, following expansion, the average cell division rate,  $\lambda$ , and degree of  
359 asymmetry,  $r$ , were adjusted to values that remained constant over the short time course of  
360 the experiment.

361

362 Applied to the TRAM treatment, we found that the fine structure of the basal and total  
363 clone size could be reproduced with an average cell division time,  $1/\lambda = 4.3$  days, a  
364 reduction quantitatively consistent with the BrdU data, and  $r = 0.17$ , decreased from that  
365 found under unperturbed conditions (Extended Data Fig.12b, e, f). Similarly, for SRF  
366 treatment, we obtained an excellent fit to the clonal data with an average cell division time,  
367  $1/\lambda = 3.8$  days, consistent with the BrdU data, and  $r = 0.08$  (Extended Data Fig.12a, c, d).  
368 These results show that, under SRF treatment conditions, and to a much lesser extent in the  
369 TRAM treatment, the fraction of stem cell divisions resulting in symmetric renewal is  
370 strongly decreased, providing a striking contrast with the untreated expansion conditions.

371

#### 372 **Discussion**

373

374 In defining the cellular basis of epidermal fate, our aim was to find the simplest model that  
375 is consistent with the wide range of clone fate data across all conditions. Given the rapid



376 convergence of the clone size distribution to an exponential-like scaling dependence, a  
377 feature found ubiquitously in clonal lineage tracing studies of epithelial tissues<sup>4</sup>, we  
378 imposed the constraint that the model must have at its apex an equipotent self-renewing  
379 cell population that is stochastically lost and replaced<sup>2</sup>. However, such scaling behaviour  
380 cannot rule out the existence of a more complex hierarchical cellular organization<sup>2</sup>. Here,  
381 we have used finer-features of the clonal data to identify and characterize heterogeneity  
382 with the proliferative compartment. Using this approach, we found that a persistent  
383 even/odd signature in the clone size data provided evidence for a proliferative hierarchy in  
384 which stem cell differentiation is not direct, but occurs through one round of terminal  
385 division. Moreover, to sustain robust even/odd correlations over the long-term, we found  
386 evidence of a local niche-like organization in which progenitor cell loss through terminal  
387 division must be compensated predominantly by the asymmetric division of the *same*  
388 neighbouring stem cell. Whether this association is communicated by environmental signals  
389 from the extracellular matrix, polarity cues, or other environmental factors remains an  
390 important and interesting open question. Alongside clonal fate data, further evidence for  
391 proliferative heterogeneity was found from the analysis of scRNA-seq data.

392

393 Finally, although the two-progenitor cell model is able to predict the clonal dynamics across  
394 a range of conditions, more complex models involving further sub-compartmentalisation of  
395 the proliferative compartment cannot be ruled out. Equally, further studies will be required  
396 to assess whether the same cellular organization prevails in other squamous epithelial tissue  
397 types. Importantly, this model will be important in identifying possible biochemical and  
398 mechanical mechanisms that regulate basal cell fate choice.

399

400

#### 401 **Supplementary References**

402

- 403 1 Blanpain, C. & Simons, B. D. Unravelling stem cell dynamics by lineage tracing. *Nat*  
404 *Rev Mol Cell Biol* **14**, 489-502 (2013).
- 405 2 Klein, A. M. & Simons, B. D. Universal patterns of stem cell fate in cycling adult  
406 tissues. *Development* **138**, 3103-3111 (2011).
- 407 3 Clayton, E. *et al.* A single type of progenitor cell maintains normal epidermis. *Nature*  
408 **446**, 185-189 (2007).
- 409 4 Piedrafita, G., Kostiou, V., Wabik, A. & Colom, B. A single-progenitor model as the  
410 unifying paradigm of epidermal and esophageal epithelial maintenance in mice.  
411 *Nature Communications* **11**, 1429 (2020).
- 412 5 Klein, A. M., Doupe, D. P., Jones, P. H. & Simons, B. D. Mechanism of murine  
413 epidermal maintenance: cell division and the voter model. *Physical review. E,*  
414 *Statistical, nonlinear, and soft matter physics* **77**, 031907 (2008).
- 415 6 Rulands, S. & Simons, B. D. Emergence and universality in the regulation of stem cell  
416 fate, *Current Opinion in Systems Biology* **5**, 57-62 (2017).
- 417 7 Marques-Pereira, J. P. & Leblond, C. P. Mitosis and differentiation in the stratified  
418 squamous epithelium of the rat esophagus. *The American journal of anatomy* **117**,  
419 73-87 (1965).
- 420 8 Mesa, K. R. *et al.* Homeostatic Epidermal Stem Cell Self-Renewal Is Driven by Local  
421 Differentiation. *Cell stem cell* **23**, 677-686.e674 (2018).

422 9 Yamaguchi, K. & Kawaguchi, K. Universal voter model emergence in genetically l  
423 abeled homeostatic tissues. arXiv: 1903.02985.

424 10 Allen, T. D. & Potten, C. S. Fine-structural identification and organization of the  
425 epidermal proliferative unit. *Journal of cell science* **15**, 291-319 (1974).

426 11 Mackenzie, I. C. Retroviral transduction of murine epidermal stem cells  
427 demonstrates clonal units of epidermal structure. *The Journal of investigative*  
428 *dermatology* **109**, 377-383 (1997).

429 12 Rompolas, P. *et al.* Spatiotemporal coordination of stem cell commitment during  
430 epidermal homeostasis. *Science (New York, N.Y.)* **352**, 1471-1474 (2016).

431 13 Mascre, G. *et al.* Distinct contribution of stem and progenitor cells to epidermal  
432 maintenance. *Nature* **489**, 257-262 (2012).

433 14 Miroshnikova, Y. A. *et al.* Adhesion forces and cortical tension couple cell  
434 proliferation and differentiation to drive epidermal stratification. *Nature cell biology*  
435 **20**, 69-80 (2018).

436 15 de Navascues, J. *et al.* Drosophila midgut homeostasis involves neutral competition  
437 between symmetrically dividing intestinal stem cells. *The EMBO journal* **31**, 2473-  
438 2485 (2012).

439
